# Supplementary material
Source: PubMed Central journal article supplement (PMC3096069)

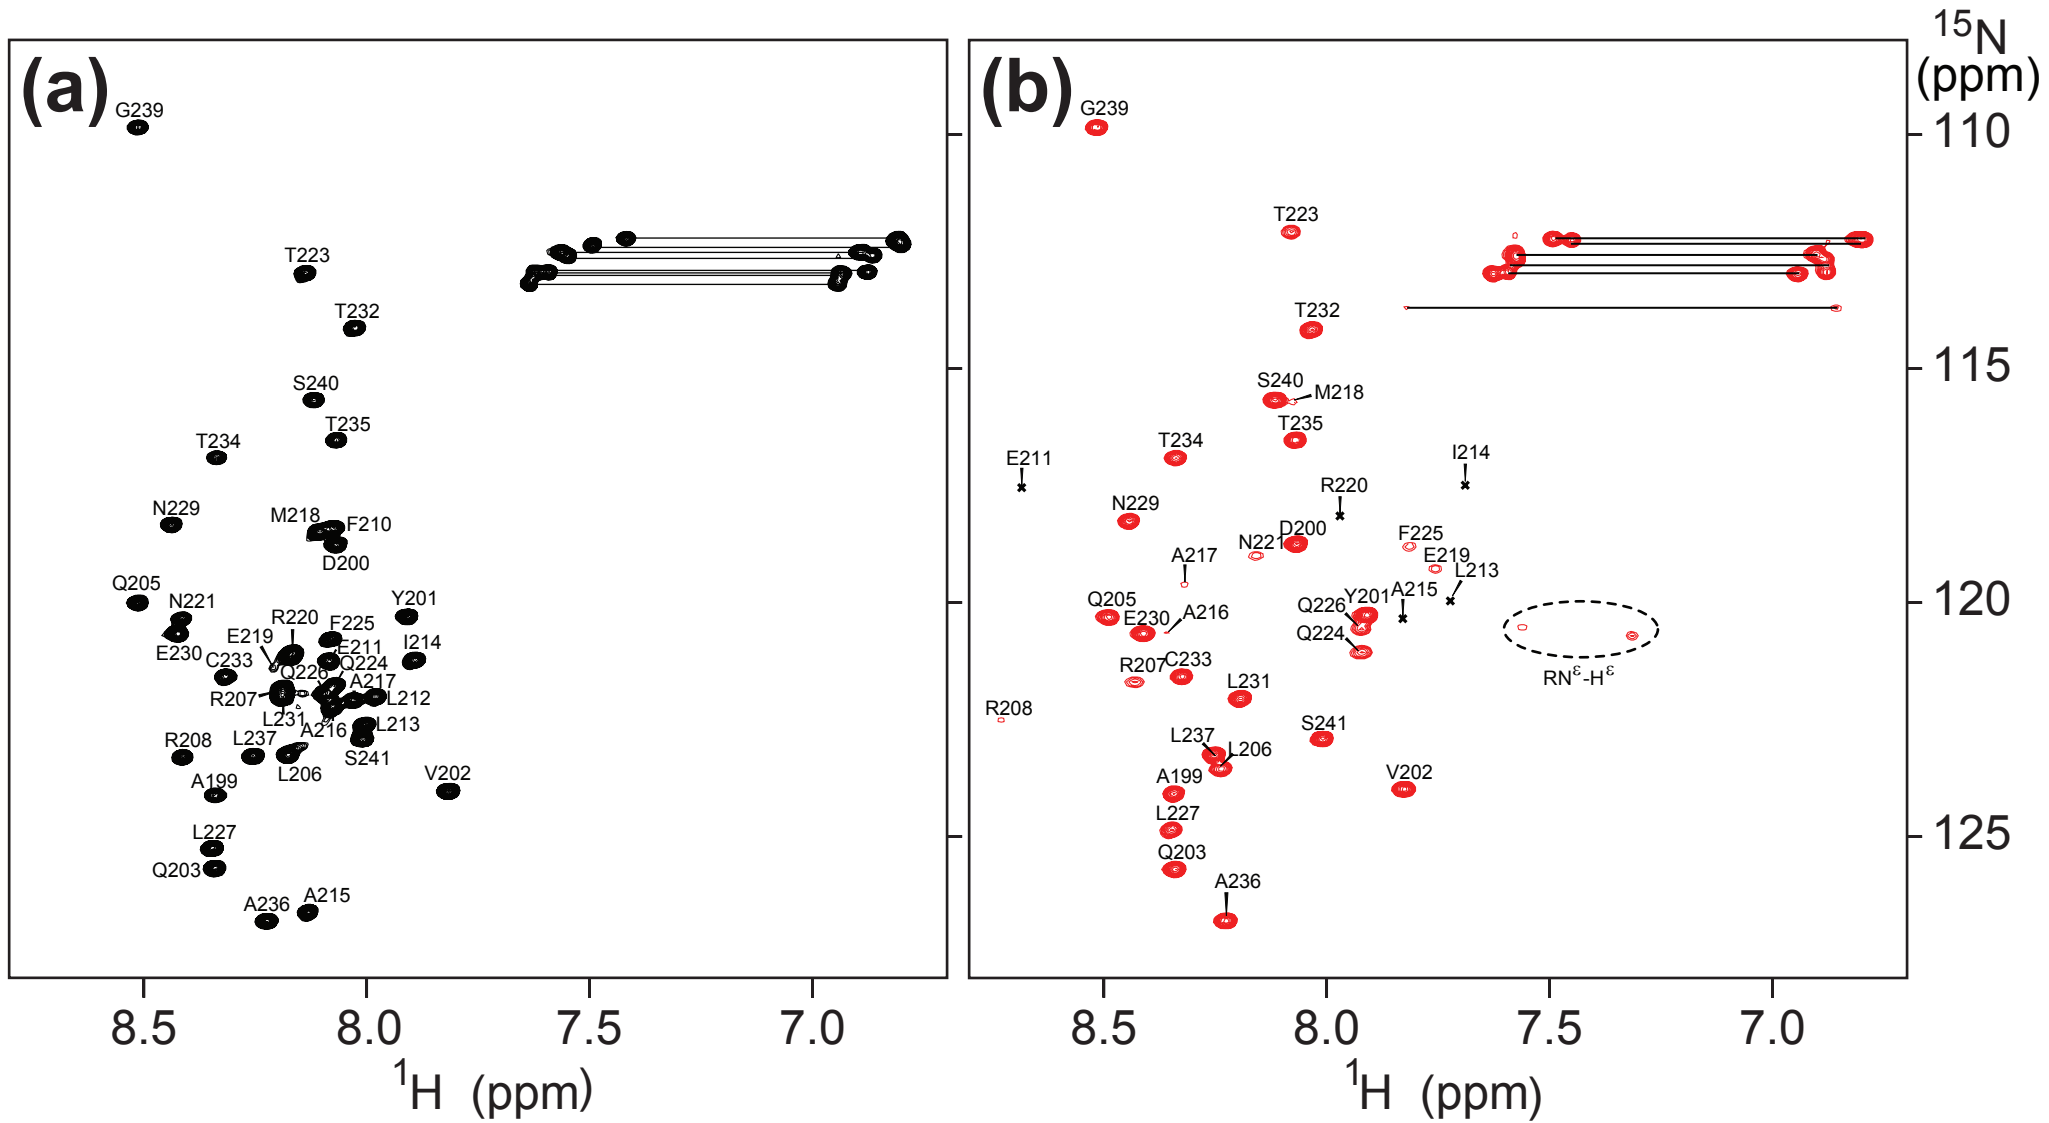

Supplementary Figure G1

Supplement: NIHMS284984-supplement-1.pdf [file NIHMS284984-supplement-1.pdf]
